# Supplementary material for: Tuning Rheological Performance of Silica Concentrated Shear Thickening Fluid by Using Graphene Oxide
Source: Hindawi journal article supplement (doi:10.1155/2015/734250), 2015-01-01
Supplement: f1 [file 734250.f1.pdf]

## Supplementary Figures

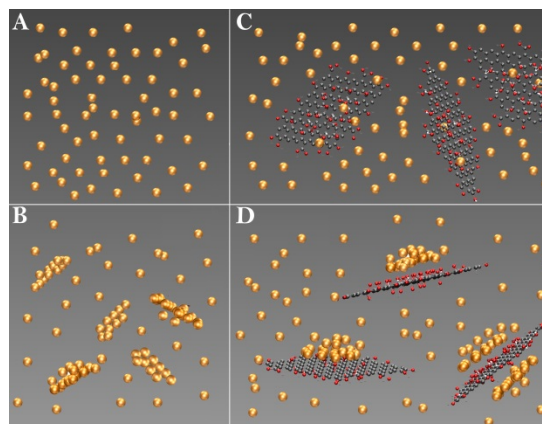

Fig.S1 Scheme for the shear thickening behavior. (a) Silica concentrated STF. (b) Silica concentrated STF under shear. (c) Silica concentrated STF with GO. (d) Silica concentrated STF with GO under shear. (Particles in this graph represent silica aggregates with the different size)

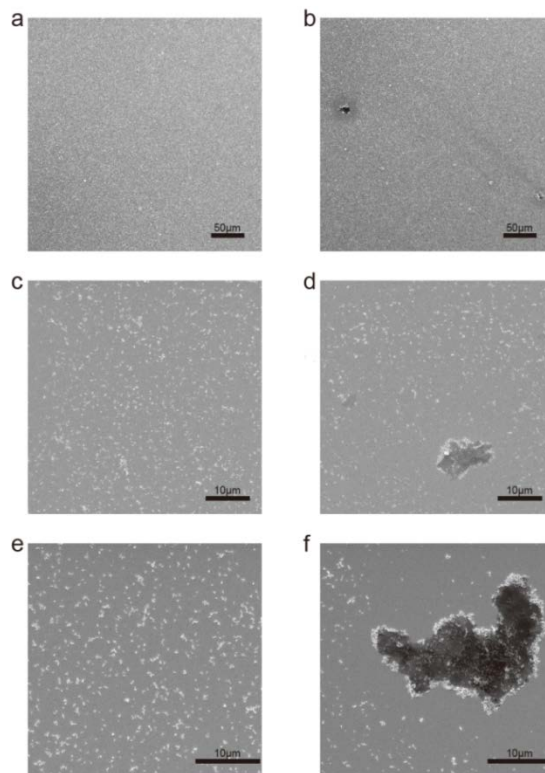

Fig.S2 SEM images with different magnification. (a),(c),(e) Silica/PEG (b),(d),(f) Silica/PEG+GO

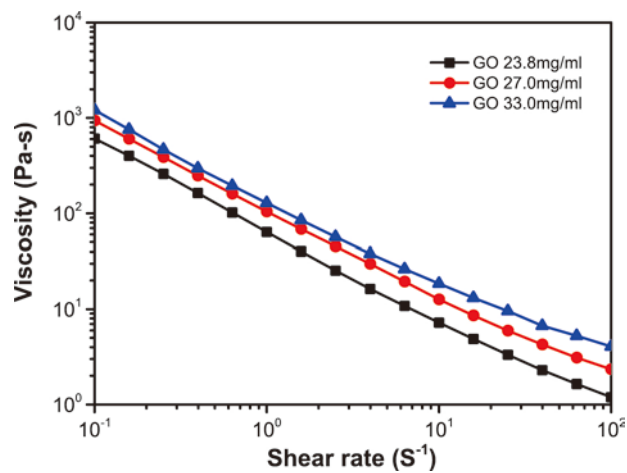

Fig.S3 The steady shear test of GO with different concentrations.

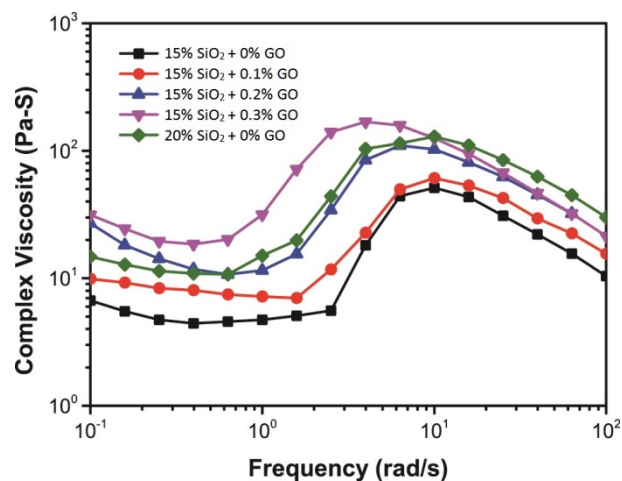

Fig.S4 Dynamic frequency test at the constant strain of 250% showing the complex viscosity change with the increasing frequency sweep for colloidal suspension of fumed silica in PEG with various loading amount of GO and silica and the numbers represent the concentration of each component in weight ratio.
